# Supplementary material
Source: publisher figshare collection journal article supplement (https://gsajournals.figshare.com/ndownloader/files/15090275)
Supplement: Supplementary file 1 [file 15090275]

## Sheet: Sheet1
File S8. Interaction partners of LAE-1::sGFP fusion in N. crassa
Accession	Description	Score	Coverage	# Proteins	# Unique Peptides	# Peptides	# PSMs	# AAs	MW [kDa]	calc. pI
NCU00646T1	NCU00646 | Neurospora crassa OR74A methyltransferase LaeA (327 aa)	168.769	82.82	1	23	23	52	326	37.4518	6.41748
NCU01731T0	NCU01731 | Neurospora crassa OR74A velvetA-like-1 (555 aa)	90.448	50.72	1	21	21	32	554	61.5503	8.93896
NCU02775T0	NCU02775 | Neurospora crassa OR74A hypothetical protein (471 aa)	36.2728	29.15	1	8	8	11	470	50.9594	7.15186
NCU09873T0	NCU09873 | Neurospora crassa OR74A acetate utilization-6 (606 aa)	11.9055	14.38	1	7	7	7	605	67.2154	6.62451
NCU02542T1	NCU02542 | Neurospora crassa OR74A embden-meyerhof pathway-1 (490 aa)	11.1087	16.97	2	6	6	6	489	54.1413	5.19873
NCU02374T0	NCU02374 | Neurospora crassa OR74A regulatory particle, non-ATPase-like-9 (382 aa)	2.05002	10.24	1	3	3	3	381	43.8346	5.50342
NCU03911T0	NCU03911 | Neurospora crassa OR74A F-actin-capping protein subunit alpha (274 aa)	1.67176	13.92	1	3	3	3	273	29.9791	6.31592
NCU02397T0	NCU02397 | Neurospora crassa OR74A isoleucine-valine-5 (577 aa)	0	11.11	1	3	3	3	576	64.2045	5.74463
NCU07474T0	NCU07474 | Neurospora crassa OR74A ergot alkaloid biosynthetic protein A (337 aa)	5.28367	10.42	1	2	2	2	336	37.1686	6.66846
NCU06440T0	NCU06440 | Neurospora crassa OR74A proteosome catalytic alpha-4 (270 aa)	2.40495	12.27	2	2	2	2	269	29.5843	7.40088
NCU02113T0	NCU02113 | Neurospora crassa OR74A ubiquitin-conjugating enzyme E2 13 (152 aa)	2.21452	23.18	1	2	2	2	151	16.9709	6.31592
NCU06457T0	NCU06457 | Neurospora crassa OR74A asparaginyl-tRNA synthetase (581 aa)	2.02744	4.66	1	2	2	2	580	66.1007	6.17627
NCU04790T1	NCU04790 | Neurospora crassa OR74A eukaryotic peptide chain release factor GTP-binding subunit (730 aa)	1.79147	3.84	2	2	2	2	729	79.303	8.66064
NCU07697T0	NCU07697 | Neurospora crassa OR74A tricarboxylic acid-4 (380 aa)	1.62819	8.44	1	2	2	2	379	40.9603	7.41553
NCU07267T0	NCU07267 | Neurospora crassa OR74A blue light-induced-3 (267 aa)	0	11.28	1	2	2	2	266	29.1976	8.68994
NCU08920T0	NCU08920 | Neurospora crassa OR74A ATP-binding cassette sub-family F member 2 (614 aa)	0	5.06	1	2	2	2	613	68.2785	7.00537
NCU03575T0	NCU03575 | Neurospora crassa OR74A isoleucyl-tRNA synthetase (1080 aa)	0	2.69	1	2	2	2	1079	124.135	6.40479
NCU04266T0	NCU04266 | Neurospora crassa OR74A hypothetical protein (92 aa)	4.93946	23.08	1	1	1	2	91	9.55769	5.0083
NCU02333T1	NCU02333 | Neurospora crassa OR74A arginase-1 (336 aa)	3.34783	6.27	2	1	1	1	335	35.9904	6.04932
NCU07414T0	NCU07414 | Neurospora crassa OR74A hypothetical protein similar to protein mitochondrial targeting protein Mas5 (415 aa)	3.20304	6.04	1	1	1	1	414	45.2884	6.66846
NCU05689T0	NCU05689 | Neurospora crassa OR74A cytochrome oxidase-4 (187 aa)	3.10083	14.52	1	1	1	1	186	20.6002	6.34131
NCU05118T0	NCU05118 | Neurospora crassa OR74A vacuolar membrane ATPase-10 (116 aa)	2.89609	10.43	1	1	1	1	115	13.0397	7.50342
NCU02602T0	NCU02602 | Neurospora crassa OR74A hypothetical protein (81 aa)	2.87296	17.5	1	1	1	1	80	8.50832	10.0083
NCU02684T0	NCU02684 | Neurospora crassa OR74A chromatin remodelling factor 4-3 (641 aa)	2.71222	2.03	1	1	1	1	640	69.4071	5.75732
NCU00261T0	NCU00261 | Neurospora crassa OR74A CTP synthase (586 aa)	2.51358	3.08	1	1	1	1	585	64.7294	6.49365
NCU03870T1	NCU03870 | Neurospora crassa OR74A hypothetical protein (734 aa)	2.15322	3.27	2	1	1	1	733	74.8608	4.67822
NCU04238T0	NCU04238 | Neurospora crassa OR74A histone H1-binding protein (472 aa)	2.11152	4.25	1	1	1	1	471	50.8385	4.66553
NCU07859T0	NCU07859 | Neurospora crassa OR74A cyclopropane-fatty-acyl-phospholipid synthase (526 aa)	1.78624	2.29	1	1	1	1	525	59.7538	6.99072
NCU00768T0	NCU00768 | Neurospora crassa OR74A mRNA binding post-transcriptional regulator (392 aa)	1.67202	3.07	1	1	1	1	391	42.1503	7.51807
